1 **Sero-prevalence of anti-SARS-CoV-2 antibodies in Chattogram Metropolitan Area,**  
2 **Bangladesh**

3 Jahan Ara<sup>1</sup>, Md. Sirazul Islam<sup>2,3</sup>, Md. Tarek Ul Quader<sup>4</sup>, Anan Das<sup>1</sup>, F. M. Yasir Hasib<sup>2,5</sup>,  
4 Mohammad Saiful Islam<sup>6</sup>, Tazrina Rahman<sup>7</sup>, Seemanta Das<sup>1</sup>, M.A. Hassan Chowdhury<sup>8</sup>, Goutam  
5 Buddha Das<sup>3,9</sup>, and Sharmin Chowdhury<sup>1,2,3</sup>.

6 <sup>1</sup>One Health Institute, Chattogram Veterinary and Animal Sciences University, Khulshi-4225,  
7 Chattogram, Bangladesh;

8 <sup>2</sup>Department of Pathology and Parasitology, Faculty of Veterinary Medicine, Chattogram  
9 Veterinary and Animal Sciences University, Khulshi-4225, Chattogram, Bangladesh;

10 <sup>3</sup>COVID-19 Detection Laboratory, Chattogram Veterinary and Animal Sciences University,  
11 Khulshi-4225, Chattogram, Bangladesh;

12 <sup>4</sup>Department of Anesthesiology and ICU, Chittagong Medical College Hospital, Chattogram,  
13 Bangladesh;

14 <sup>5</sup>Department of Infectious Diseases and Public Health, City University of Hong Kong, Hong Kong  
15 SAR;

16 <sup>6</sup>Department of Emergency and Accident, Imperial Hospital Limited, Chattogram, Bangladesh;

17 <sup>7</sup>Department of Microbiology and Virology, Chittagong Medical College, Chattogram,  
18 Bangladesh;

19 <sup>8</sup>Department of Medicine, Chittagong Medical College, Chattogram, Bangladesh;

20 <sup>9</sup>Department of Animal Science and Nutrition, Chattogram Veterinary and Animal Sciences  
21 University, Khulshi-4225, Chattogram, Bangladesh.

22

23 **\* Corresponding author:**

24 **Sharmin Chowdhury, PhD**

25 Director, One Health Institute, Chattogram Veterinary and Animal Sciences University, Khulshi,  
26 Chattogram-4225.

27 E-mail: sharminchowdhury@cvasu.ac.bd

28

29 **Abstract**

30 **Background:** Seroprevalence studies of coronavirus disease 2019 (COVID-19) assess the degree  
31 of undetected transmission in the community. Different groups, such as healthcare workers  
32 (HCWs), garment workers, and others, are deemed vulnerable due to their workplace hazards and  
33 immense responsibility.

34 **Purpose:** The present study was conducted to estimate the seroprevalence of anti-SARS-CoV-2  
35 antibody (IgG) and its association with different explanatory variables. Further, the antibody was  
36 quantified to assess the increasing or decreasing trend over different intervention periods and  
37 according to other factors.

38 **Methodology:** This cross-sectional study observed health workers - doctor, nurse, hospital staff,  
39 etc. in and outpatients (non-COVID-19) and garments workers of Chattogram metropolitan area  
40 (CMA, N=748) from randomly selected six government and private hospitals and two garment  
41 factories. Study subjects were included upon written consent, fulfilling specific inclusion criteria.  
42 Venous blood was collected following standard aseptic methods. Qualitative and quantitative  
43 ELISA was used to identify and quantify antibodies (IgG) in serum samples. Descriptive,  
44 univariable, and multivariable statistical analysis was performed.

45 **Results:** Overall seroprevalence was estimated as 66.99% (95% CI: 63.40%-70.40%).  
46 Seroprevalence among HCWs, in and outpatients, and garments workers were 68.99 % (95% CI:

47 63.8%-73.7%), 81.37 % (95% CI: 74.7%-86.7%), and 50.56 % (95% CI: 43.5%-57.5%),  
48 respectively. Seroprevalence was 44.47 % (95% CI: 38.6%-50.4%) in the non-vaccinated  
49 population while it was significantly ( $p < 0.001$ ) higher in the population receiving the first dose  
50 (61.66 %, 95% CI: 54.8%-68.0%) and both (first and second) doses of vaccine (100%, 95% CI:  
51 98.4%-100%). The mean titer of the antibody was estimated as 255.46 DU/ml and 159.08 DU/ml  
52 in the population with both doses and one dose of vaccine, respectively, compared to 53.71 DU/ml  
53 of the unvaccinated population. A decreasing trend in the titer of antibodies with increasing time  
54 after vaccination was observed.

55 **Conclusions:** Seroprevalence and mean antibody titer varied according to different factors in this  
56 study. The second dose of vaccine significantly increased the seroprevalence and titer, which  
57 decreased to a certain level over time. Although antibody was produced following natural  
58 infection, the mean titer was relatively low compared to antibody after vaccination. This study  
59 emphasizes the role of the vaccine in antibody production. Based on the findings, interventions  
60 like continuing extensive mass vaccination of the leftover unvaccinated population and bringing  
61 the mass population with a second dose under a third dose campaign might be planned.

62  
63 **Keywords:** Seroprevalence, anti-SARS-CoV-2 antibody, antibody titer, IgG

## 64 65 **Introduction**

66 Chattogram, the port city of Bangladesh, is classified as a high-risk zone for SARS-CoV-2 contact  
67 transmission and is one of the most crowded economic and trading centers [1]. On April 3, 2020,  
68 Chattogram city witnessed its first Coronavirus Disease 2019 (COVID-19) positive case [2],  
69 followed by the first death on 9 April [3]. The disease can manifest itself in various ways, from

70 asymptomatic and minor upper respiratory symptoms to severe pneumonia and acute respiratory  
71 distress syndrome [4]. While nucleic acid amplification, such as polymerase chain reaction (PCR),  
72 is the gold standard for diagnosing acute SARS-CoV-2 infection and is widely recommended, the  
73 antibody-based approach improves diagnosis accuracy by capturing asymptomatic testing and  
74 recovered infections [5].

75 During an infectious disease outbreak, seroprevalence investigations are crucial in revealing  
76 undetected infection in the population and preventing post-pandemic reappearance [6].  
77 Determining the actual burden of infection is also vital for epidemic forecasting and response  
78 planning. Seroprevalence studies are potent in identifying the number of undiagnosed missing  
79 cases with mild or no symptoms or who cannot undergo testing that may contribute significantly  
80 to the transmission [7-11]. Further, seroprevalence studies estimate the susceptible population in a  
81 community. A current investigation discovered that up to 23% of the patients diagnosed with  
82 COVID-19 from December 2020 to February 2021 in Bangladesh were asymptomatic [12]. Thus,  
83 antibody testing could be crucial to determine the actual SARS-CoV-2 exposure rates since PCR  
84 only identifies the viral nucleic acid in individuals with existing symptoms [13].

85 According to numerous research, seropositivity fluctuates considerably depending on parameters  
86 such as location and time [7, 14]. Antibody titers reach their peak one month after the onset of  
87 symptoms, and their levels are directly proportional to the severity of the illness [15]. Titers  
88 continue to fall after that, with IgM and IgA titers falling fast and IgG titers falling more slowly  
89 [16]. However, a greater understanding of antibody responses to SARS-CoV-2 after natural  
90 infection might aid in the development of more successful vaccination strategies in the future.  
91 Bangladesh started administering COVID-19 vaccinations on January 27, 2021, and mass  
92 immunization commenced on February 7, 2021 [17, 18]. As of December 21, 2021, 50.27% of the

93 target population had received the first dose, and 34.60% received the second dose [19].  
94 Bangladesh has already started administering third doses to senior persons aged 60 and up, people  
95 with comorbidities, and frontline workers. [20]. According to a web-based anonymous cross-  
96 sectional survey conducted among the general Bangladeshi population between January 30 and  
97 February 6, 2022, 61.16% of respondents were inclined to accept/take the COVID-19 vaccine [21].  
98 However, vaccination coverage and seroprevalence among the general public must be investigated  
99 nationwide to know the herd immunity.

100 In the COVID-19 pandemic, HCWs are facing immense challenges worldwide. Occupational  
101 exposures among HCWs have been documented in numerous nations as worrying [22]. Likewise,  
102 COVID-19 has had a significant impact on the healthcare system of Bangladesh. According to the  
103 latest data from the Bangladesh Medical Association, between March 8, 2020, and November 11,  
104 2021, 9455 HCWs, including physicians, nurses, and other staff, were infected with COVID-19,  
105 as well as 188 doctors died as a result [23]. Front liners directly involved in diagnosing, treating,  
106 and caring for COVID-19 patients are at risk of physical and psychological distress [24-29].  
107 Similarly, workers in the garment industry confront different problems in the workplace all around  
108 the world. According to the Bangladesh Garment Manufacturers and Exporters Association  
109 (BGMEA), 4500 garment companies employ over 4.5 million people or nearly 2.5 percent of the  
110 country's entire population [30]. The bulk of the industries operate with limited space, making it  
111 challenging to enforce physical distancing norms [31]. SARS-CoV-2 transmission might be  
112 exacerbated by crowded workplaces, transportation, and lack of physical distancing [32]. Hence,  
113 it is necessary to put in place measures including risk management in the workplace, vulnerable  
114 employee care, the development of an occupational surveillance system, and vaccination policy

115 administration to address the COVID-19 issues [33, 34]. Thus, knowing the true seroprevalence  
116 both in the risk groups and community might assist in planning interventions efficiently.

117 In this study, we reported population-based SARS-CoV-2 seropositivity among HCWs, indoor and  
118 outdoor patients of various government and private hospitals, and garment workers of CMA, as  
119 determined by enzyme-linked immunosorbent assay (ELISA). Moreover, we measured the  
120 antibody titer, and both outcomes (seropositivity and antibody titer) were tested to know the  
121 association of different factors.

## 122 **Materials and Methods**

### 123 **Study design and setting**

124 From February to September 2021, we conducted a cross-sectional population-based study among  
125 HCWs (e.g., doctors, nurses, hospital staff, ward boy, and cleaner), garment workers, and indoor  
126 and outdoor patients (non-COVID-19) of six government and private hospitals each, and two  
127 garment factories in CMA. All hospitals belonging to the study area were stratified according to  
128 their affiliation status; government and private. From each stratum, six hospitals were randomly  
129 selected. Sample size was calculated considering the following parameter: 0.65 proportion, 5%  
130 margin of error, 95% confidence limit and design effect 2. Each organization's human resources  
131 department provided a list of personnel. Following a simple random sampling technique, samples  
132 were collected from a total of 748 respondents.

133 We interviewed participants to collect information after receiving written consent. Answering a  
134 questionnaire and taking blood to test SARS CoV-2 antibodies were part of the study procedure.  
135 Our study followed a World Health Organization protocol for population-level COVID-19  
136 antibody testing [35]. The questionnaire included sociodemographic details and factors

137 hypothesized to be associated with seropositivity. Participants were included in the study based on  
138 several inclusion criteria.

139 Inclusion criteria:

- 140 • **Asymptomatic:** Only an asymptomatic group was included to ensure the presence of  
141 antibodies. Participants had no COVID-19 related clinical signs, e.g., fever, coughing, runny  
142 nose, sore throat, dyspnea, shortness of breath, aches and pain at the time of sample collection
- 143 • **In case of having past confirmed COVID-19 status (by Rt PCR):**
  - 144 i. Participants who had already passed at least 28 days after a negative Rt-PCR test.
  - 145 ii. Participants who did not take a repeated test to ensure negativity had passed at least 42  
146 days after the first COVID-19 test.

147 Besides, persons under 18 were excluded, as were those with an incomplete questionnaire.

#### 148 **Baseline blood collection and processing**

149 Heparinized blood specimens (6mL) were collected and transported to the clinical pathology  
150 laboratory (CPL) of Chattogram Veterinary and Animal Sciences University (CVASU) within  
151 three hours of collection. The serum was separated to evaluate the IgG antibody and kept at -20 °C  
152 until serological investigation.

#### 153 **Serological test examination**

154 Antibody was determined by a commercial qualitative assay using COVID-19 IgG ELISA test  
155 (Beijing Kewei Clinical Diagnostic Reagent Inc., China; Ref: 601340) as per the manufacturer's  
156 instructions. The assay is an enzyme-linked immunoassay (ELISA) that detects IgG against the  
157 SARS-CoV-2. An index (Absorbance/Cutt-off) of <1 was interpreted as negative, 0.9 to 1.1 as

158 borderline (retesting of these specimens in duplicates was done to confirm results), and  $\geq 1$  index  
159 as positive. Per the manufacturer, the sensitivity and specificity of the assay for IgG are 93.8% and  
160 97.3%, respectively. Positive and negative controls were included in all assay batches. Repeated  
161 testing using the same specimen yielded the same interpretation.

162 The concentration of IgG antibodies was determined by SARS-CoV-2 S1-RBD IgG (DiaSino®  
163 Laboratories Co., Ltd. Zhengzhou, China, Ref: DS207704), which is based on enzyme-linked  
164 immunoassay for the quantitative detection of IgG antibodies. The assay's sensitivity and  
165 specificity for IgG quantification, according to the manufacturer, are 98.41% and 98.02%,  
166 respectively. Quantitative results were calculated as a ratio of the extinction of the control or tested  
167 specimen over the extinction of the calibrator. Results were reported in standardized units for the  
168 quantitative kits that included six calibrators to quantify the antibody concentration (i.e., DiaSino  
169 units/mL). A value of  $<10$  DU/mL was considered negative, and values  $>10$  DU/mL were  
170 positive.

## 171 **Data management**

172 The linearity of the quantitative variables was evaluated by categorizing them into four categories  
173 using quartiles as cut-off values. Logistic regression analysis was conducted on the categorized  
174 variables, and parameter estimates were observed for an increasing or decreasing trend. In case of  
175 linear increase or decrease in the parameter estimates, linearity in the quantitative variable was  
176 assumed and used without modification. In the case of nonlinearity, a quartile was used to  
177 categorize it. However, some quantitative variables were categorized considering research interest.  
178 For instance, the number of days between the first dose of vaccine and quantification of antibody  
179 titer was categorized as 'after one month' and 'after two months' and between the second dose of  
180 vaccine and quantification of antibody titer was categorized as 'after two months', 'after four



181 months' and 'after six months'. The number of days between the vaccination and the antibody titer  
182 was achieved from the date of vaccination and sample collection. The prevalence estimates were  
183 adjusted with the test kit performance (sensitivity and specificity), and the adjusted prevalence was  
184 denoted as true prevalence.

## 185 **Data analysis**

186 In the study period, a total of 748 qualitative and quantitative test results were included in the  
187 analysis. To evaluate the correlation and collinearity in the categorical and quantitative variables,  
188 Cramer's V test, Spearman correlation coefficient, Chi-square test, t-test or ANOVA, where  
189 appropriate, was used. Variables with a significant association or a Spearman correlation  
190 coefficient above 0.4 were regarded as correlated. The effects of different potential explanatory  
191 variables on the binary outcome - presence/absence of anti-SARS-CoV-2 antibody, was evaluated  
192 using univariable and followed by multivariable logistic regression models. To select the final  
193 multivariable model, all variables with a significant p-value in the univariable models were  
194 included in a model and a manually conducted backward selection strategy was followed by  
195 deleting one variable at a time with the highest P-value. Interactions between all explanatory  
196 variables (2 ways) were evaluated in the final model. Effect of variables on the mean titer of the  
197 antibody was assessed by t-test and one way ANOVA. P-values <0.05 were considered as  
198 significant throughout the analysis. STATA-IC 13 (StataCorp, California, USA) and GraphPad  
199 Prism 7.00 for Windows (GraphPad Software, La Jolla, California, USA) were used for statistical  
200 analyses and visualization.

## 201 **Ethical approval and informed consent**

202 Institutional ethical approval was taken from the authorized committee of Chattogram Veterinary  
 203 and Animal Sciences University (CVASU), Bangladesh [CVASU/Dir(R&E) EC/2020/212(1)].

204 **Results**

205 **Sero-prevalence of SARS-CoV-2 infection**

206 SARS-CoV-2 IgG antibodies were detected in 498 (66.99%) of 748 individuals (**Table 1**).

207 Prevalence of anti-SARS-CoV-2 antibody (IgG) in different donor types along with vaccination  
 208 percentage is shown in **Figure 1**.

209

| <b>Table 1: Prevalence estimation in CMA</b> |                         |                                              |             |                                                            |               |                                               |
|----------------------------------------------|-------------------------|----------------------------------------------|-------------|------------------------------------------------------------|---------------|-----------------------------------------------|
| <b>Anti-SARS CoV-2 antibody</b>              | <b>Total population</b> | <b>Unadjusted seroprevalence, % (95% CI)</b> |             | <b>Test performance adjusted seroprevalence % (95% CI)</b> |               | <b>Known positives (RT-qPCR positive) (%)</b> |
| Present                                      | 498                     | 66.58                                        | (63.1-70.0) | 66.99                                                      | (63.40-70.40) | 91 (80.53)                                    |
| Absent                                       | 250                     | 33.42                                        | (30.1-36.9) | 32.60                                                      | (29.20-36.19) | 22 (19.47)                                    |

210

211

212 **Figure 1:** Prevalence of anti-SARS-CoV-2 antibody (IgG) in different donor types along with  
 213 vaccinated percent.

214

215 **Characteristics of study participants**

216 From February -September 2021, we enrolled 748 CMA service providers (362 HCWs, 205  
 217 garments workers, 179 indoor/outdoor patients). Among them, 27.48% were garment workers, 150  
 218 (20.11%) hospital staff, 145 (19.44%) doctors, 148 (19.84%) outdoor patients, 67 (8.98%) nurses,  
 219 and 31 (4.16%) indoor patients. The majority (n=507; 67.96%) were males. In the total population,  
 220 292 (39.14%) did not receive any COVID-19 vaccine, 223 (29.89%) received the first dose of  
 221 vaccine, and 231 (30.97%) received both doses of the vaccine. The responses regarding contact  
 222 with confirmed COVID-19 cases were: yes (342; 47.17%), no (307; 42.34%), and unknown (76;  
 223 10.48%). One hundred and ninety-seven (32.35%) participants had pre-existing medical  
 224 conditions (**Table 2**).

225

| <b>Table 2:</b> Baseline characteristics of study participants |                |                         |                                           |                     |
|----------------------------------------------------------------|----------------|-------------------------|-------------------------------------------|---------------------|
| <b>Variables</b>                                               | <b>Level</b>   | <b>Total population</b> | <b>Known positives (RT-qPCR positive)</b> | <b>Asymptomatic</b> |
| Donor type                                                     | Doctor         | 145 (19.44)             | 40 (35.40)                                | 85 (16.13)          |
|                                                                | Nurse          | 67 (8.98)               | 19 (16.81)                                | 43 (8.16)           |
|                                                                | Hospital staff | 150 (20.11)             | 27 (23.89)                                | 109 (20.68)         |
|                                                                | Indoor patient | 31 (4.16)               | 2 (1.77)                                  | 26 (4.93)           |

|                                                   |                           |             |            |                       |
|---------------------------------------------------|---------------------------|-------------|------------|-----------------------|
|                                                   | Outdoor patient           | 148 (19.84) | 21 (18.58) | 109 (20.68)           |
|                                                   | Garments worker           | 205 (27.48) | 4 (3.54)   | 155 (29.41)           |
| Gender                                            | Male                      | 507 (67.96) | 73 (65.18) | 362 (68.69)           |
|                                                   | Female                    | 239 (32.04) | 39 (34.82) | 165 (31.31)           |
| Age (year)                                        | 19 to 29                  | 201 (26.91) | 15 (13.27) | 149 (28.27)           |
|                                                   | 30 to 35                  | 184 (24.63) | 30 (26.55) | 123 (23.34)           |
|                                                   | 36 to 44                  | 180 (24.10) | 34 (30.09) | 123 (23.34)           |
|                                                   | 45 to 84                  | 182 (24.36) | 34 (30.09) | 132 (25.05)           |
| Vaccination                                       | No                        | 292 (39.14) | 11 (9.82)  | 222 (42.13)           |
|                                                   | Only 1 <sup>st</sup> dose | 223 (29.89) | 38 (33.93) | 153 (29.03)           |
|                                                   | Both doses                | 231 (30.97) | 63 (56.25) | 152 (28.84)           |
| Days passed after 1 <sup>st</sup> dose of vaccine | 14 to 30 days             | 45 (24.06)  | 8 (25.81)  | 30 (23.08; 16.1-31.3) |
|                                                   | 31 to 60 days             | 142 (75.94) | 23 (74.19) | 100 (76.92)           |
| Days passed after 2 <sup>nd</sup> dose vaccine    | 14 to 60 days             | 19 (8.26)   | 6 (9.38)   | 12 (8.00)             |
|                                                   | 61 to 120 days            | 86 (37.39)  | 20 (31.25) | 60 (40.00)            |
|                                                   | 120 to 180 days           | 125 (54.35) | 37 (59.38) | 78 (52.00)            |
| Days between PCR test and antibody test           | 21 to 60 days             | -           | 17 (15.60) | -                     |
|                                                   | 61 to 120 days            | -           | 16 (14.68) | -                     |
|                                                   | 121 to 180 days months    | -           | 23 (21.10) | -                     |
|                                                   | >180 days                 | -           | 53 (48.62) | -                     |

|                                |            |             |             |             |
|--------------------------------|------------|-------------|-------------|-------------|
| Contact with confirmed case    | Yes        | 342 (47.17) | 79 (71.17)  | 230 (45.19) |
|                                | No         | 307 (42.34) | 17 (15.32)  | 232 (45.58) |
|                                | Don't know | 76 (10.48)  | 15 (13.51)  | 47 (9.23)   |
| Family member                  | 1 to 3     | 186 (26.23) | 31 (29.52)  | 130 (25.79) |
|                                | 4 to 6     | 443 (62.48) | 64 (60.95)  | 321 (63.69) |
|                                | ≥7         | 80 (11.28)  | 10 (9.52)   | 53 (10.52)  |
| Taking immunosuppressive drugs | Yes        | 15 (2.13)   | 7 (6.42)    | 8 (1.63)    |
|                                | No         | 688 (97.87) | 102 (93.58) | 484 (98.37) |
| Comorbidities                  | Yes        | 197 (32.35) | 38 (37.25)  | 291 (68.79) |
|                                | No         | 412 (67.65) | 64 (62.75)  | 132 (31.29) |

226

## 227 SARS-CoV-2 antibody titer

228 Indoor/outdoor patients had the highest mean titer of 197.18 DU/mL, followed by HCWs (163.30  
 229 DU/mL) and garment workers (77.05 DU/mL) ( $p < 0.001$ ). The level (mean) of IgG-spike  
 230 antibodies in both dosage vaccine recipients was higher (255.46 DU/mL) than in those who  
 231 received one (159.08 DU/mL) or no doses (53.71 DU/mL) of the vaccine ( $p < 0.001$ ). When the  
 232 participants had a contact with confirmed cases had a mean titer of 170.89 DU/mL, not known had  
 233 a titer of 160.05 DU/mL, and in case of noncontact 116.45 DU/mL ( $p < 0.001$ ). The mean titer of  
 234 different age groups was statistically significant; nevertheless, we removed this variable from  
 235 further analysis to minimize the bias due to vaccination strategy followed in Bangladesh (priority

236 given to aged); details in **Table 3**. The changes in mean titer of IgG antibody across different time  
 237 intervals of intervention (one and both doses of vaccination) is illustrated in **Figure 2**.  
 238

**Table 3:** Univariable analysis (ttest, one way ANOVA) to evaluate the mean difference of quantity of anti-SARS-CoV-2 antibody in serum samples

| Variable                      | Level                  | Mean titer of IgG (DU/ml) | SD     | P-value |
|-------------------------------|------------------------|---------------------------|--------|---------|
| Doner type                    | Health worker          | 163.30                    | 153.54 | <0.001  |
|                               | Indoor/outdoor patient | 197.18                    | 147.04 |         |
|                               | Garments worker        | 77.05                     | 115.63 |         |
| Gender                        | Female                 | 140.09                    | 151.36 | 0.31    |
|                               | Male                   | 151.83                    | 148.38 |         |
| Age (year)                    | 19 to 29               | 106.90                    | 132.23 | <0.001  |
|                               | 30 to 35               | 151.16                    | 157.71 |         |
|                               | 36 to 44               | 160.85                    | 143.08 |         |
|                               | 45 to 84               | 176.95                    | 155.92 |         |
| Vaccination                   | No                     | 53.71                     | 91.16  | <0.001  |
|                               | Only 1st dose          | 159.08                    | 161.05 |         |
|                               | Both doses             | 255.46                    | 117.04 |         |
| Days passed after 1st dose of | 31 to 60 days          | 131.39                    | 152.08 | 0.10    |
|                               | 14 to 30 days          | 175.10                    | 164.09 |         |

|                                |                 |        |        |        |
|--------------------------------|-----------------|--------|--------|--------|
| vaccine                        |                 |        |        |        |
| Days passed after              | 120 to 180 days | 147.09 | 119.29 | 0.02   |
| 2nd dose vaccine               | 61 to 120 days  | 255.82 | 106.00 |        |
|                                | 14 to 60 days   | 324.42 | 128.42 |        |
| Asymptomatic                   | No              | 190.01 | 161.93 | <0.001 |
|                                | Yes             | 130.03 | 140.19 |        |
| Had COVID-19 confirmed status  | No              | 191.69 | 142.70 | 0.005  |
|                                | Yes             | 244.87 | 159.74 |        |
| Contact with confirmed case    | No              | 116.45 | 135.21 | <0.001 |
|                                | Yes             | 170.89 | 154.19 |        |
|                                | Don't know      | 160.05 | 158.98 |        |
| Taking immunosuppressive drugs | No              | 143.02 | 150.09 | 0.32   |
|                                | Yes             | 181.38 | 152.08 |        |

239

240 **Figure 2:** Evaluation of time effects of vaccines mean difference of quantitative anti-SARS-CoV-2  
 241 antibody (IgG) in serum samples.

242

### 243 Risk factor analysis

244 Univariable analysis ( $\chi^2$  test, logistic regression) to evaluate the association of different variables  
 245 with the seroprevalence of anti-SARS-CoV-2 antibody

246 Indoor/outdoor patients amongst the different donor groups had a positivity rate of 81.37% (144  
 247 of 179) compared to 68.99% (248 of 362) in the HCWs and 50.56% in the garments workers (104

248 of 205); the difference was statistically significant ( $p < 0.001$ ). Both doses of vaccine receivers  
 249 showed significantly ( $p < 0.001$ ) higher seropositivity than one dose or no vaccine receivers.  
 250 Similarly, contact with confirmed COVID-19 cases showed a higher odd of being seropositive as  
 251 compared to noncontact ( $p = 0.01$ ) [OR= 1.59] (Table 4).  
 252

| <b>Table 4:</b> Univariable analysis ( $\chi^2$ test, logistic regression) to evaluate the association of different variables with seroprevalence of anti-SARS-CoV-2 antibody |                              |                        |                             |           |                |
|-------------------------------------------------------------------------------------------------------------------------------------------------------------------------------|------------------------------|------------------------|-----------------------------|-----------|----------------|
| <b>Variable</b>                                                                                                                                                               | <b>Level (n)</b>             | <b>Presence of IgG</b> | <b>TP (95% CI of TP) **</b> | <b>OR</b> | <b>P-value</b> |
| Donor type                                                                                                                                                                    | Health worker (362)          | 248                    | 68.99 (63.8-73.7)           | Ref.      | <0.001         |
|                                                                                                                                                                               | Indoor/outdoor patient (179) | 144                    | 81.37 (74.7-86.7)           | 1.8       |                |
|                                                                                                                                                                               | Garments worker (205)        | 104                    | 50.56 (43.5-57.5)           | 0.47      |                |
| Gender                                                                                                                                                                        | Female (239)                 | 151                    | 63.47 (56.9-69.5)           | Ref.      | 0.15           |
|                                                                                                                                                                               | Male (507)                   | 347                    | 68.92 (64.6-72.9)           | 1.26      |                |
| Age (year)                                                                                                                                                                    | 19 to 29 (201)               | 114                    | 56.76 (49.5-63.6)           | Ref.      | 0.002          |



|                                             |                          |     |                      |        |        |
|---------------------------------------------|--------------------------|-----|----------------------|--------|--------|
|                                             | 30 to 35 (184)           | 119 | 65.01<br>(57.6-71.8) | 1.39   |        |
|                                             | 36 to 44 (180)           | 132 | 73.99<br>(66.8-80.1) | 2.09   |        |
|                                             | 45 to 84 (182)           | 133 | 73.73<br>(66.6-79.8) | 2.07   |        |
| Vaccination                                 | No (292)                 | 131 | 44.47<br>(38.6-50.4) | Ref.   | <0.001 |
|                                             | Only 1st dose<br>(223)   | 137 | 61.66<br>(54.8-68.0) | 1.95   |        |
|                                             | Both doses<br>(231)      | 229 | 100<br>(98.4-100.0)  | 140.72 |        |
| Days passed after<br>1st dose of<br>vaccine | 31 to 60 days<br>(142)   | 79  | 55.64<br>(47.1-63.8) | Ref.   | 0.29   |
|                                             | 14 to 30 days<br>(45)    | 29  | 64.78<br>(49.6-77.5) | 1.44   |        |
| Days passed after<br>2nd dose vaccine       | 120 to 180<br>days (125) | 123 | 99.9 (95.7-<br>100)  | -      | -      |
|                                             | 61 to 120 days<br>(86)   | 86  | 100<br>(97.2-100)    | -      |        |
|                                             | 14 to 60 days<br>(19)    | 19  | 100<br>(84.2-100)    | -      |        |

|                                |                 |     |                       |      |      |
|--------------------------------|-----------------|-----|-----------------------|------|------|
| Asymptomatic                   | No (220)        | 160 | 73.36<br>(66.9-79.03) | Ref. | 0.13 |
|                                | Yes (528)       | 355 | 67.66<br>(63.4-71.68) | 0.76 |      |
| Had COVID-19 confirmed status  | No (144)        | 119 | 83.65<br>(76.3-89.1)  | Ref. | 0.66 |
|                                | Yes (113)       | 91  | 81.46<br>(72.9-87.9)  | 0.86 |      |
| Contact with confirmed case    | No (307)        | 187 | 61.11<br>(55.3-66.6)  | Ref. | 0.01 |
|                                | Yes (342)       | 244 | 71.93<br>(66.7-76.6)  | 1.59 |      |
|                                | Don't know (76) | 49  | 64.81<br>(53.1-75.0)  | 1.16 |      |
| Taking immunosuppressive drugs | No (688)        | 447 | 65.32<br>(61.5-68.9)  | Ref. | 0.20 |
|                                | Yes (15)        | 12  | 80.91<br>(54.7-94.3)  | 2.15 |      |

253 \*\*TP=True prevalence

254 Multivariable analysis (logistic regression) to determine the potential factors associated with

255 SARS-CoV-2 antibody-positive status in the study area

256 The multivariable logistic regression model identified two potential factors that might be  
 257 influencing the seropositivity of SARS-CoV-2 antibodies in the studied population. The chance of  
 258 being seropositive was 2.22 times higher in indoor/outdoor patients ( $p= 0.002$ ) and 1.69 times for  
 259 garments workers than HCWs ( $p= 0.01$ ). Further, both doses of vaccine receivers had a higher  
 260 chance of being positive (OR=174.02) than one dose (OR=2.34) or none dose receivers, and the  
 261 difference was statistically significant ( $p< 0.001$ ) (**Table 5**).

262

| <b>Table 5:</b> Output from the final multivariable logistic regression model showing the adjusted effect of potential factors on the seroprevalence of anti-SARS-CoV-2 antibody |                        |           |               |                |
|----------------------------------------------------------------------------------------------------------------------------------------------------------------------------------|------------------------|-----------|---------------|----------------|
| <b>Variable</b>                                                                                                                                                                  | <b>Level</b>           | <b>OR</b> | <b>95% CI</b> | <b>P-value</b> |
| Doner type                                                                                                                                                                       | Health worker          | Ref.      |               |                |
|                                                                                                                                                                                  | Indoor/outdoor patient | 2.22      | 1.33-3.68     | 0.002          |
|                                                                                                                                                                                  | Garments worker        | 1.69      | 1.09-2.62     | 0.01           |
| Vaccination                                                                                                                                                                      | No                     | Ref.      |               |                |
|                                                                                                                                                                                  | Only 1st dose          | 2.34      | 1.56-3.50     | <0.001         |
|                                                                                                                                                                                  | Both doses             | 174.02    | 41.46-730.40  | <0.001         |

263

## 264 **Discussion**

265 The overall adjusted seroprevalence estimate of SARS-CoV-2 antibodies was 66.99% (95% CI:  
 266 63.40%-70.4%) in CMA in this research which is slightly higher than a previous finding (64.1%)  
 267 using an immunoassay test to detect antibodies in the Sitakunda sub-district (Chattogram district)

268 of Bangladesh from March to June 2021 [36]. Another research conducted by icddr'b between  
269 October 2020 and February 2021 found a lower (55%) estimate in Chattogram than ours. During  
270 the same study period, however, the adjusted seroprevalence in Dhaka, the capital of Bangladesh,  
271 was 71% [37]. Thus, based on several investigations, it can be assumed that seropositivity in  
272 Chattogram has been progressively increasing over time. The prevalence might have increased due  
273 to either high infection levels or a positive response to the national immunization campaign in its  
274 early phases [38]. According to the findings, 68.99% HCWs and 81.37% indoor/outdoor patients  
275 were seropositive. Indoor and outdoor patients were more likely than health professionals to be  
276 seropositive, possibly due to the combined effect of lack of awareness and knowledge about  
277 COVID-19 among some of them and effect of vaccination as they might be were composed of a  
278 mixed population of lower to upper socio-economic status and with different educational levels.  
279 Tripathi et al., 2020 reported that HCWs were more educated of COVID-19 symptoms, incubation  
280 time, problems in high-risk patients, and had greater access to therapy than other residents (non  
281 HCWs) [39]. In Navi Mumbai in May 2021, serosurveillance of anti-SARS-Cov-2 antibodies  
282 among essential workers revealed that police personnel had a 72% seropositivity rate, whereas  
283 HCWs had a 48% positivity rate [40]. Moreover, we observed that, among the garment workers,  
284 just under 20% received vaccines and just above 50% were seropositive, which might have majorly  
285 been achieved from natural infections (**Figure 1**). It might indicate their lack of awareness about  
286 disease transmission and vaccination.

287 We found that the IgG antibody was produced in 61.66% of the participants who received the first  
288 dose of COVID-19 vaccination. This number increased to 100% among individuals who received  
289 a second dose. In a study by Bayram et al., 2021, HCWs' seropositivity rates after the first and  
290 second doses of CoronaVac vaccination were found to be 77.8% and 99.6%, respectively [41].

291 Subsequently, when we quantified the antibody titer, we observed it higher in those who received  
292 the second dose than in those who received just the first. Detection of highly avid anti-S1/-RBD  
293 IgG, independent of the causal mechanism, is seen as a very positive indication and indicator of  
294 enhanced humoral immunity [42].

295 Human coronavirus infection may not always result in long-lasting antibody responses, with  
296 antibody titers dropping over time [43]. The waning of antibody responses is an essential element  
297 to consider while developing a coronavirus vaccine [44]. Our study showed that by the second  
298 month following the initial dose, the mean IgG titer in the body had dropped by nearly 25%.  
299 However, the antibody's propensity to deteriorate with time was noteworthy. This study revealed  
300 that the available mean antibody titers that remained after two months of receiving the second dose  
301 had dropped by roughly 21% by the fourth month, and within the sixth month the mean antibody  
302 titer was 147.09 DU/mL. So, it can be assumed that the body still retained considerable antibodies  
303 against COVID-19 six months after receiving the second dose vaccine, though the threshold level  
304 to prevent the virus is not known.

305 The underreporting of SARS-CoV-2 infection cases makes it difficult to assess the actual infection  
306 burden. Limited testing, flaws in the reporting infrastructure, and a substantial proportion of  
307 asymptomatic infections contribute to the underreporting [45]. Asymptomatic carriers spread  
308 COVID-19, but the clinical characteristics, viral dynamics, and antibody responses of these  
309 individuals are unknown [46]. According to our findings, 67.66% of the asymptomatic population  
310 was seropositive where only 29.03 % of asymptomatic individuals received the first dose of  
311 COVID-19 vaccine, and 28.84 % received the second dose too. According to various population-  
312 based studies, a considerable majority of seropositive people were asymptomatic or had no known  
313 encounter with a COVID-19 patient [47-49]. Meanwhile, the observation that asymptomatic

314 people had lower mean IgG levels than symptomatic people back up previous findings that  
315 asymptomatic carriers have a lesser humoral immune response to COVID-19 infection [47,50].  
316 The study also revealed that people aged above 35 had a greater seroprevalence. Higher  
317 seroprevalence among adults could be associated with increased vaccination exposure. On January  
318 26 of this year, the government began accepting registrations for the COVID-19 vaccine for  
319 persons aged 55 and up in the country [51]. In the second phase, the age limit was dropped to 40  
320 years or more, and vaccination of youngsters aged 12-17 has recently begun in the country [52].

321 The latest and more deadly SARS-CoV-2 viral strains, as well as the possibility of losing immunity  
322 with time after vaccination, have prompted health professionals to consider the need for boosters.  
323 Research on threshold titers giving protection and time intervals of declining immunity post-  
324 immunization for low-middle-income nations like Bangladesh are essential before launching  
325 further booster doses. An important application of serological tests is to determine the antibody  
326 responses generated upon SARS-CoV-2 infection and vaccination [53]. The continuation of this  
327 study on those who received the second dose more than six months ago will provide an appropriate  
328 booster interval, risk population category, and overview of herd immunity. According to a recent  
329 study conducted in the greater Chattogram division it is evident that administering the first dose  
330 (Oxford-AstraZeneca) vaccine significantly reduces health risk during the COVID-19 infection  
331 phase [54]. So, it is evident that similar research is clamoring for justifications for booster  
332 administration. Additionally, more research is required to assess the efficacy of booster doses.  
333 Government and healthcare professionals must adopt COVID-19 vaccine booster dose utilization  
334 guidelines that consider the risks of fading immunity, new virus strains, and prioritizing vulnerable  
335 groups.

336 Our study has several limitations, such as the fact that we only collected samples from hospitals  
337 and the garment industry, but the results would be more representative of the community if we  
338 included other groups. We could not compare immunological responses produced by different  
339 COVID-19 vaccine brands at the same post-vaccination interval since distinct COVID-19 vaccines  
340 were licensed and supplied to CMA at different times. We did not reveal the type and name of  
341 COVID-19 vaccines, whereas a sufficient fraction was not covered under the vaccination program,  
342 and we were concerned about an infodemic.

343

#### 344 **Acknowledgment**

345 The authors acknowledge Bangladesh Institute of Tropical and Infectious Diseases (BITID),  
346 Chattogram General Hospital, Chittagong Medical University, Medical Center (Pvt.), Imperial  
347 Hospital Limited, Chattogram Asian Apparels Limited, Clifton Garments Limited, Bangladesh  
348 Garment Manufacturers and Exporters Association (BGMEA) Chattogram, and BGMEA Hospital  
349 and Diagnostic Center for providing samples and administrative support. The laboratory facilities  
350 were supported by the Dept. of Pathology and Parasitology, CVASU. The authors sincerely  
351 acknowledge the One Health Institute, CVASU for logistic support.

352

#### 353 **Conflict of interest**

354 The authors have no potential conflict of interest.

355

#### 356 **Authors Contribution**

357 **JA:** Conceptualization, methodology, project proposal writing, administration, data curation,  
358 writing-original draft, review and editing. **MSI:** Conceptualization, methodology, project

359 administration, laboratory tasks, data visualization, writing-original draft, review and editing.  
360 **MTUQ:** Sample collection, data curation. **AD:** Sample collection, data curation. **FMYH:**  
361 Laboratory tasks. **MSI:** Sample collection, data curation. **TR:** Sample collection, data curation.  
362 **SD:** Data curation, writing review and editing. **MAHC:** Conceptualization, investigation,  
363 methodology, supervision, and reviewing-final manuscript. **GBD:** Project investigation, fund  
364 acquisition, and reviewing-final manuscript. **SC:** Conceptualization, investigation, methodology,  
365 supervision, data- validation, analysis, visualization, writing-original draft, and reviewing-final  
366 manuscript.

367

### 368 **Funding Information**

369 The study was funded by the Director of Research & Extension, CVASU.

370

### 371 **References**

372 1. Rana EA, Chowdhury NS, Islam MS, Ara J, Nasrin SS, Dutta P, Bristi SZ, Nizami TA,  
373 Chakraborty P, Siddiki AZ. Molecular detection and prevalence of SARS-CoV-2 during the  
374 early outbreak in southern Bangladesh. *International Journal of One Health*. 2020;6(2):153-9.

375 2. Dhaka Tribune, First Coronavirus Case Confirmed in Chittagong, 6 Buildings in Lockdown.

376 2020 April 3. [Internet]. Available from:

377 <https://archive.dhakatribune.com/bangladesh/nation/2020/04/03/covid-19-first-case-confirmed->

378 [in-chittagong](https://archive.dhakatribune.com/bangladesh/nation/2020/04/03/covid-19-first-case-confirmed-in-chittagong)



- 379 3. Dhaka Tribune, Another Corona Virus Patient Dies in Chittagong. 2020 April 13. [Internet].  
380 Available from: <https://www.dhakatribune.com/health/coronavirus/2020/04/13/another->  
381 [coronavirus-patient-dies-in-chittagong](https://www.dhakatribune.com/health/coronavirus/2020/04/13/another-coronavirus-patient-dies-in-chittagong)
- 382 4. Goenka MK, Afzalpurkar S, Goenka U, Das SS, Mukherjee M, Jajodia S, Shah BB, Patil  
383 VU, Rodge G, Khan U, Bandyopadhyay S. Seroprevalence of COVID-19 amongst health care  
384 workers in a tertiary care hospital of a metropolitan city from India.
- 385 5. Vernet R, Charrier E, Grogg J, Mach N. A Quantitative ELISA Protocol for Detection of  
386 Specific Human IgG against the SARS-CoV-2 Spike Protein. *Vaccines*. 2021 Jul;9(7):770.
- 387 6. Bryant JE, Azman AS, Ferrari MJ, Arnold BF, Boni MF, Boum Y, Hayford K, Luquero FJ,  
388 Mina MJ, Rodriguez-Barraquer I, Wu JT. Serology for SARS-CoV-2: Apprehensions,  
389 opportunities, and the path forward. *Science immunology*. 2020 May 19;5(47):eabc6347.
- 390 7. Shakiba M, Nazemipour M, Salari A, Mehrabian F, Nazari SS, Rezvani SM, Ghasempour Z,  
391 Heidarzadeh A, Mansournia MA. Seroprevalence of SARS-CoV-2 in Guilan Province, Iran,  
392 April 2020. *Emerging infectious diseases*. 2021 Feb;27(2):636.
- 393 8. Bendavid E, Mulaney B, Sood N, Shah S, Bromley-Dulfano R, Lai C, Weissberg Z,  
394 Saavedra-Walker R, Tedrow J, Bogan A, Kupiec T. Covid-19 antibody seroprevalence in santa  
395 clara county, california. *International journal of epidemiology*. 2021 Apr;50(2):410-9.
- 396 9. Gomes LR, Durans AM, Napoleão-Pêgo P, Waterman JA, Freitas MS, De Sá NB, Pereira  
397 LV, Furtado JS, Aquino RG, Machado MC, Fintelman-Rodrigues N. Multiepitope Proteins for

- 398 the Differential Detection of IgG Antibodies against RBD of the Spike Protein and Non-RBD  
399 Regions of SARS-CoV-2. *Vaccines*. 2021 Sep;9(9):986.
- 400 10. Freeman B, Lester S, Mills L, Rasheed MA, Moye S, Abiona O, Hutchinson GB, Morales-  
401 Betoulle M, Krapinunaya I, Gibbons A, Chiang CF. Validation of a SARS-CoV-2 spike protein  
402 ELISA for use in contact investigations and serosurveillance. *Biorxiv*. 2020 Jan 1.
- 403 11. Brown TS, Walensky RP. Serosurveillance and the COVID-19 epidemic in the US:  
404 undetected, uncertain, and out of control. *Jama*. 2020 Aug 25;324(8):749-51.
- 405 12. Hossain M, Das SC, Raza MT, Ahmed IU, Eva IJ, Karim T, Chakraborty P, Gupta SD.  
406 Immediate and post-COVID complications of symptomatic and asymptomatic COVID-19  
407 patients in Bangladesh: a cross-sectional retrospective study. *Asian Journal of Medical and*  
408 *Biological Research*. 2021 Jun 30;7(2):191-201.
- 409 13. Thomas SN, Altawallbeh G, Zaun CP, Pape KA, Peters JM, Titcombe PJ, Dileepan T, Rapp  
410 MJ, Bold TD, Schacker TW, Arbefeville S. Initial determination of COVID-19 seroprevalence  
411 among outpatients and healthcare workers in Minnesota using a novel SARS-CoV-2 total  
412 antibody ELISA. *Clinical Biochemistry*. 2021 Apr 1;90:15-22.
- 413 14. Lerner AM, Eisinger RW, Lowy DR, Petersen LR, Humes R, Hepburn M, Cassetti MC. The  
414 COVID-19 serology studies workshop: recommendations and challenges. *Immunity*. 2020 Jul  
415 14;53(1):1-5.

- 416 15. Wang H, Wiredja D, Yang L, Bulterys PL, Costales C, Röltgen K, Manalac J, Yee J,  
417 Zehnder J, Shi RZ, Boyd SD. Case-Control Study of Individuals with Discrepant Nucleocapsid  
418 and Spike Protein SARS-CoV-2 IgG Results. *Clinical Chemistry*. 2021 Mar 15.
- 419 16. Gudbjartsson DF, Norddahl GL, Melsted P, Gunnarsdottir K, Holm H, Eythorsson E,  
420 Arnthorsson AO, Helgason D, Bjarnadottir K, Ingvarsson RF, Thorsteinsdottir B. Humoral  
421 immune response to SARS-CoV-2 in Iceland. *New England Journal of Medicine*. 2020 Oct  
422 29;383(18):1724-34.
- 423 17. Aljazeera, Coronavirus Pandemic, Bangladesh Starts COVID Vaccination Drive. 2021 Jan  
424 28. [Internet]. Available from: [https://www.aljazeera.com/news/2021/1/28/bangladesh-starts-](https://www.aljazeera.com/news/2021/1/28/bangladesh-starts-covid-vaccination-drive)  
425 [covid-vaccination-drive](https://www.aljazeera.com/news/2021/1/28/bangladesh-starts-covid-vaccination-drive)  
426
- 427 18. Anadolu Agency, World, Asia-Pacific, Latest on CoronavirusOutbreak, Bangladesh Starts  
428 Nationwide COVID Vaccination Drive. 2021 Feb 7. [Internet]. Available from:  
429 [https://www.aa.com.tr/en/asia-pacific/bangladesh-starts-nationwide-covid-vaccination-](https://www.aa.com.tr/en/asia-pacific/bangladesh-starts-nationwide-covid-vaccination-drive/2136643)  
430 [drive/2136643](https://www.aa.com.tr/en/asia-pacific/bangladesh-starts-nationwide-covid-vaccination-drive/2136643)
- 431 19. COVID-19 Vaccination Dashboard for Bangladesh, Health Emergency Control Center,  
432 DHIS2, Surokkha App, **2022**. [Internet]. Available from:  
433 <http://103.247.238.92/webportal/pages/covid19-vaccination-update.php>
- 434 20. Dhaka Tribune, Bangladesh Begins Booster Vaccination. 2021 Nov 28. [Internet]. Available  
435 from: [https://newsarchive.app/a/dhakatribune/2021/11/28/Bangladesh-begins-booster-](https://newsarchive.app/a/dhakatribune/2021/11/28/Bangladesh-begins-booster-vaccination)  
436 [vaccination](https://newsarchive.app/a/dhakatribune/2021/11/28/Bangladesh-begins-booster-vaccination)

- 437 21. Mahmud S, Mohsin M, Khan IA, Mian AU, Zaman MA. Knowledge, beliefs, attitudes and  
438 perceived risk about COVID-19 vaccine and determinants of COVID-19 vaccine acceptance in  
439 Bangladesh. *PloS one*. 2021 Sep 9;16(9): e0257096.
- 440 22. Bandyopadhyay S, Baticulon RE, Kadhum M, Alser M, Ojuka DK, Badereddin Y, Kamath  
441 A, Parepalli SA, Brown G, Iharchane S, Gandino S. Infection and mortality of healthcare  
442 workers worldwide from COVID-19: a systematic review. *BMJ global health*. 2020 Dec  
443 1;5(12):e003097.
- 444 23. Bangladesh Medical Association. District wise total Number of Affected Doctor, Nurse &  
445 Staff (COVID 19+) From 08/03/2020 till today on 28/09/2021. [Internet]. Available from:  
446 <https://bma.org.bd/covid-19/Total%20Affected%20Doctor,%20Nurse%20&%20Staff.pdf>
- 447 24. Chen Q, Liang M, Li Y, Guo J, Fei D, Wang L, He LI, Sheng C, Cai Y, Li X, Wang J.  
448 Mental health care for medical staff in China during the COVID-19 outbreak. *The Lancet*  
449 *Psychiatry*. 2020 Apr 1;7(4): e15-6.
- 450 25. Mhango M, Dzobo M, Chitungo I, Dzinamarira T. COVID-19 risk factors among health  
451 workers: a rapid review. *Safety and health at work*. 2020 Sep 1;11(3):262-5.
- 452 26. Iversen K, Bundgaard H, Hasselbalch RB, Kristensen JH, Nielsen PB, Pries-Heje M,  
453 Knudsen AD, Christensen CE, Fogh K, Norsk JB, Andersen O. Risk of COVID-19 in health-care  
454 workers in Denmark: an observational cohort study. *The Lancet Infectious Diseases*. 2020 Dec  
455 1;20(12):1401-8.

- 456 27. Ehrlich H, McKenney M, Elkbuli A. Protecting our healthcare workers during the COVID-  
457 19 pandemic. *The American journal of emergency medicine*. 2020 Jul 1;38(7):1527-8.
- 458 28. Shaw A, Flott K, Fontana G, Durkin M, Darzi A. No patient safety without health worker  
459 safety. *The Lancet*. 2020 Nov 14;396(10262):1541-3.
- 460 29. Kontoangelos K, Economou M, Papageorgiou C. Mental health effects of COVID-19  
461 pandemia: a review of clinical and psychological traits. *Psychiatry investigation*. 2020  
462 Jun;17(6):491.
- 463 30. Khan AN, Ullah MR. Export scenario between Bangladesh and China: Opportunities of  
464 Bangladesh in RMG Sector. *Eur Sci J*. 2017;13(28):299-320.
- 465 31. Hosen MS, Nafiujjaman M, Biswas FN. Garment employees are at higher risk than any other  
466 workers in COVID-19 pandemic in Bangladesh. *Caspian Journal of Health Research*. 2020 Jan  
467 10;5(1):1-2.
- 468 32. Dyal JW. COVID-19 among workers in meat and poultry processing facilities—19 states,  
469 April 2020. *MMWR. Morbidity and mortality weekly report*. 2020;69.
- 470 33. Marinaccio A, Guerra R, Iavicoli S. Work a key determinant in COVID-19 risk. *The Lancet*  
471 *Global Health*. 2020 Nov 1;8(11): e1368.
- 472 34. Islam MS, Hasib FY, Nath C, Ara J, Nu MS, Fazal MA, Chowdhury S. Coronavirus disease  
473 2019 and its potential animal reservoirs: A review. *Health*. 2021 Jul 1;7(2):171-81.

- 474 35. World Health Organization, Population-Based Age-Stratified Seroepidemiological  
475 Investigation Protocol for Coronavirus 2019 (COVID-19) Infection. 2020 May. [Internet].  
476 Available from: [https://www.who.int/publications/i/item/WHO-2019-nCoV-Seroepidemiology-](https://www.who.int/publications/i/item/WHO-2019-nCoV-Seroepidemiology-2020.2)  
477 2020.2
- 478 36. Bhuiyan TR, Hulse JD, Hegde S, Akhtar M, Islam T, Khan ZH, Khan II, Rashid M, Rashid  
479 R, Shirin T, Gurley ES. SARS-CoV-2 seroprevalence in Chattogram, Bangladesh before a  
480 National Lockdown, March-April 2021. medRxiv. 2021 Jan 1.
- 481 37. icddr,b, news, Higher COVID-19 Seropositivity Observed Among Residents in Dhaka and  
482 Chattogram. 2021 June 22. [Internet]. Available from: [https://www.icddr.org/news-and-](https://www.icddr.org/news-and-events/news?id=878)  
483 [events/news?id=878](https://www.icddr.org/news-and-events/news?id=878)
- 484 38. Ward H, Cooke G, Whitaker M, Redd R, Eales O, Brown JC, Collet K, Cooper E, Daunt A,  
485 Jones K, Moshe M. REACT-2 Round 5: increasing prevalence of SARS-CoV-2 antibodies  
486 demonstrate impact of the second wave and of vaccine roll-out in England. MedRxiv. 2021 Jan  
487 1.
- 488 39. Tripathi R, Alqahtani SS, Albarraq AA, Meraya AM, Tripathi P, Banji D, Alshahrani S,  
489 Ahsan W, Alnakhli FM. Awareness and preparedness of COVID-19 outbreak among healthcare  
490 workers and other residents of South-West Saudi Arabia: a cross-sectional survey. *Frontiers in*  
491 *Public Health*. 2020 Aug 18;8:482.
- 492 40. Maheshwari U, Sahai J, Hebbar V. Serosurveillance of Anti SARS-Cov-2 Antibodies among  
493 Essential Workers in Navi Mumbai—A Single Centre Study. *International Journal of Health*  
494 *Sciences and Research*. 2021;11(7):99-104.

- 495 41. Bayram A, Demirbakan H, Karadeniz PG, Erdoğan M, Koçer I. Quantitation of antibodies  
496 against SARS-CoV-2 spike protein after two doses of CoronaVac in health care workers. *Journal*  
497 *of medical virology*. 2021 May 21.
- 498 42. Neumann F, Rose R, Römpke J, Grobe O, Lorentz T, Fickenscher H, Krumbholz A.  
499 Development of SARS-CoV-2 specific IgG and virus-neutralizing antibodies after infection with  
500 variants of concern or vaccination. *Vaccines*. 2021 Jul;9(7):700.
- 501 43. Callow KA, Parry HF, Sergeant M, Tyrrell DA. The time course of the immune response to  
502 experimental coronavirus infection of man. *Epidemiology & Infection*. 1990 Oct;105(2):435-46.
- 503 44. Amanat F, Krammer F. SARS-CoV-2 vaccines: status report. *Immunity*. 2020 Apr  
504 14;52(4):583-9.
- 505 45. Bhattacharyya R, Kundu R, Bhaduri R, Ray D, Beesley LJ, Salvatore M, Mukherjee B.  
506 Incorporating false negative tests in epidemiological models for SARS-CoV-2 transmission and  
507 reconciling with seroprevalence estimates. *Scientific reports*. 2021 May 7;11(1):1-4.
- 508 46. Xiao T, Wang Y, Yuan J, Ye H, Wei L, Liao X, Wang H, Qian S, Wang Z, Liu L, Zhang Z.  
509 Early viral clearance and antibody kinetics of COVID-19 among asymptomatic carriers.  
510 *Frontiers in Medicine*. 2021;8.
- 511 47. Alkurt G, Murt A, Aydin Z, Tatli O, Agaoglu NB, Irvem A, Aydin M, Karaali R, Gunes M,  
512 Yesilyurt B, Turkez H. Seroprevalence of coronavirus disease 2019 (COVID-19) among health  
513 care workers from three pandemic hospitals of Turkey. *PloS one*. 2021 Mar 3;16(3): e0247865.

- 514 48. Mukhtar A, Alfshawy M, Alkhatib E, Hosny M, Ollaek M, Elsayed A, Salem MR, Ghaith  
515 D. Asymptomatic SARS-CoV-2 infection among healthcare workers in a non-COVID-19  
516 teaching university hospital. *Journal of Public Health Research*. 2021 Jun 24;10(3).
- 517 49. Selvaraju S, Kumar MS, Thangaraj JW, Bhatnagar T, Saravanakumar V, Kumar CP, Sekar  
518 K, Ilayaperumal E, Sabarinathan R, Jagadeesan M, Hemalatha MS. Population-based serosurvey  
519 for severe acute respiratory syndrome coronavirus 2 transmission, Chennai, India. *Emerging*  
520 *Infectious Diseases*. 2021 Feb;27(2):586.
- 521 50. Long QX, Tang XJ, Shi QL, Li Q, Deng HJ, Yuan J, Hu JL, Xu W, Zhang Y, Lv FJ, Su K.  
522 Clinical and immunological assessment of asymptomatic SARS-CoV-2 infections. *Nature*  
523 *medicine*. 2020 Aug;26(8):1200-4.
- 524 51. Dhaka Tribune, Bangladesh Lowers Covid-19 Vaccine Age Limit to 18 Years. 2021 Oct 20.  
525 [Internet]. Available from: [https://www.dhakatribune.com/bangladesh/2021/10/20/bangladesh-](https://www.dhakatribune.com/bangladesh/2021/10/20/bangladesh-lowers-covid-19-vaccine-age-limit-to-18-years)  
526 [lowers-covid-19-vaccine-age-limit-to-18-years](https://www.dhakatribune.com/bangladesh/2021/10/20/bangladesh-lowers-covid-19-vaccine-age-limit-to-18-years)
- 527 52. Dhaka Tribune, COVID Vaccination Campaign for School Students. 2021 Nov 1. [Internet].  
528 Available from: [https://www.dhakatribune.com/bangladesh/2021/11/01/covid-vaccination-](https://www.dhakatribune.com/bangladesh/2021/11/01/covid-vaccination-campaign-for-school-students-kicks-off)  
529 [campaign-for-school-students-kicks-off](https://www.dhakatribune.com/bangladesh/2021/11/01/covid-vaccination-campaign-for-school-students-kicks-off)
- 530 53. Krammer F, Simon V. Serology assays to manage COVID-19. *Science*. 2020 Jun  
531 5;368(6495):1060-1.



- 532 54. Rana EA, Dutta P, Islam MS, Nizami TA, Das T, Chowdhury S, Das GB. Severity  
533 assessment of single dose Oxford–AstraZeneca vaccinated individuals infected with SARS CoV-  
534 2 in the Southeast Bangladesh. medRxiv. 2021 Jan 1.

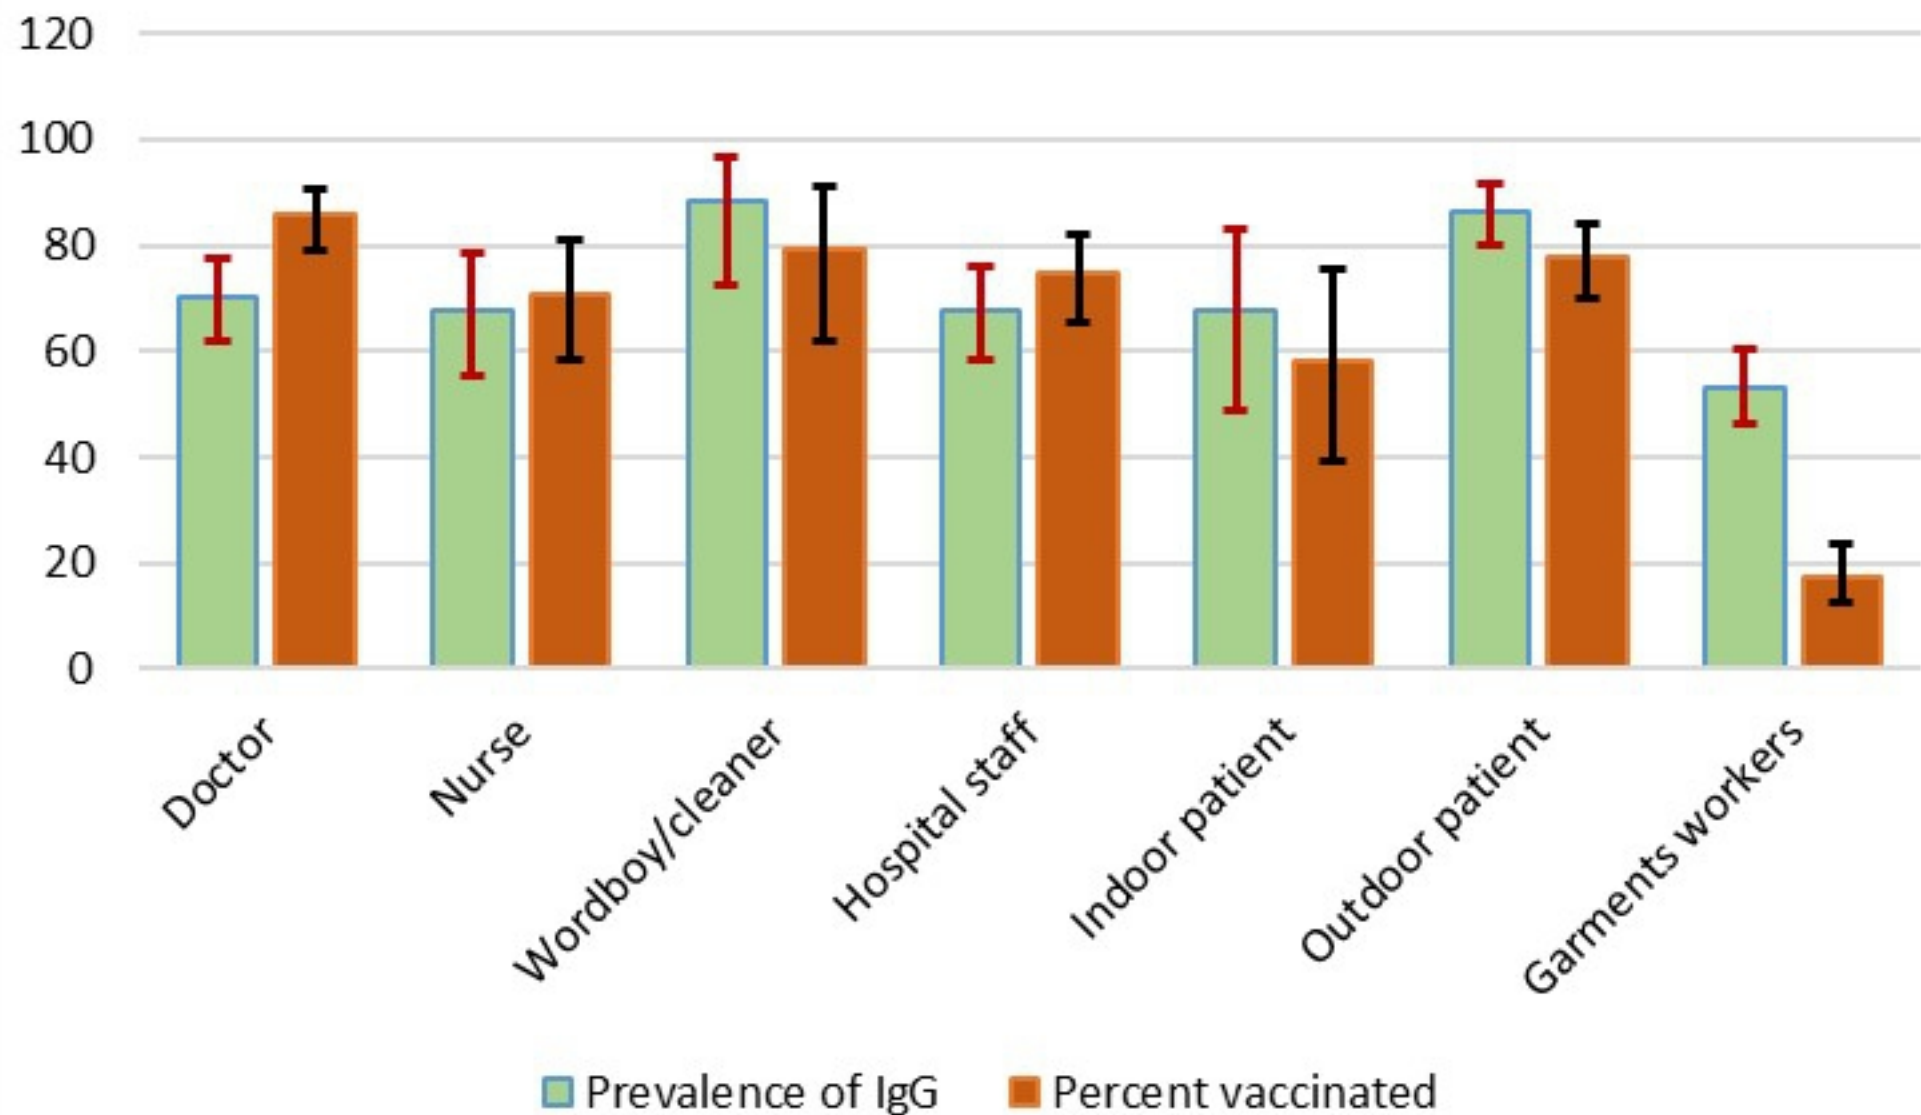

Figure 1

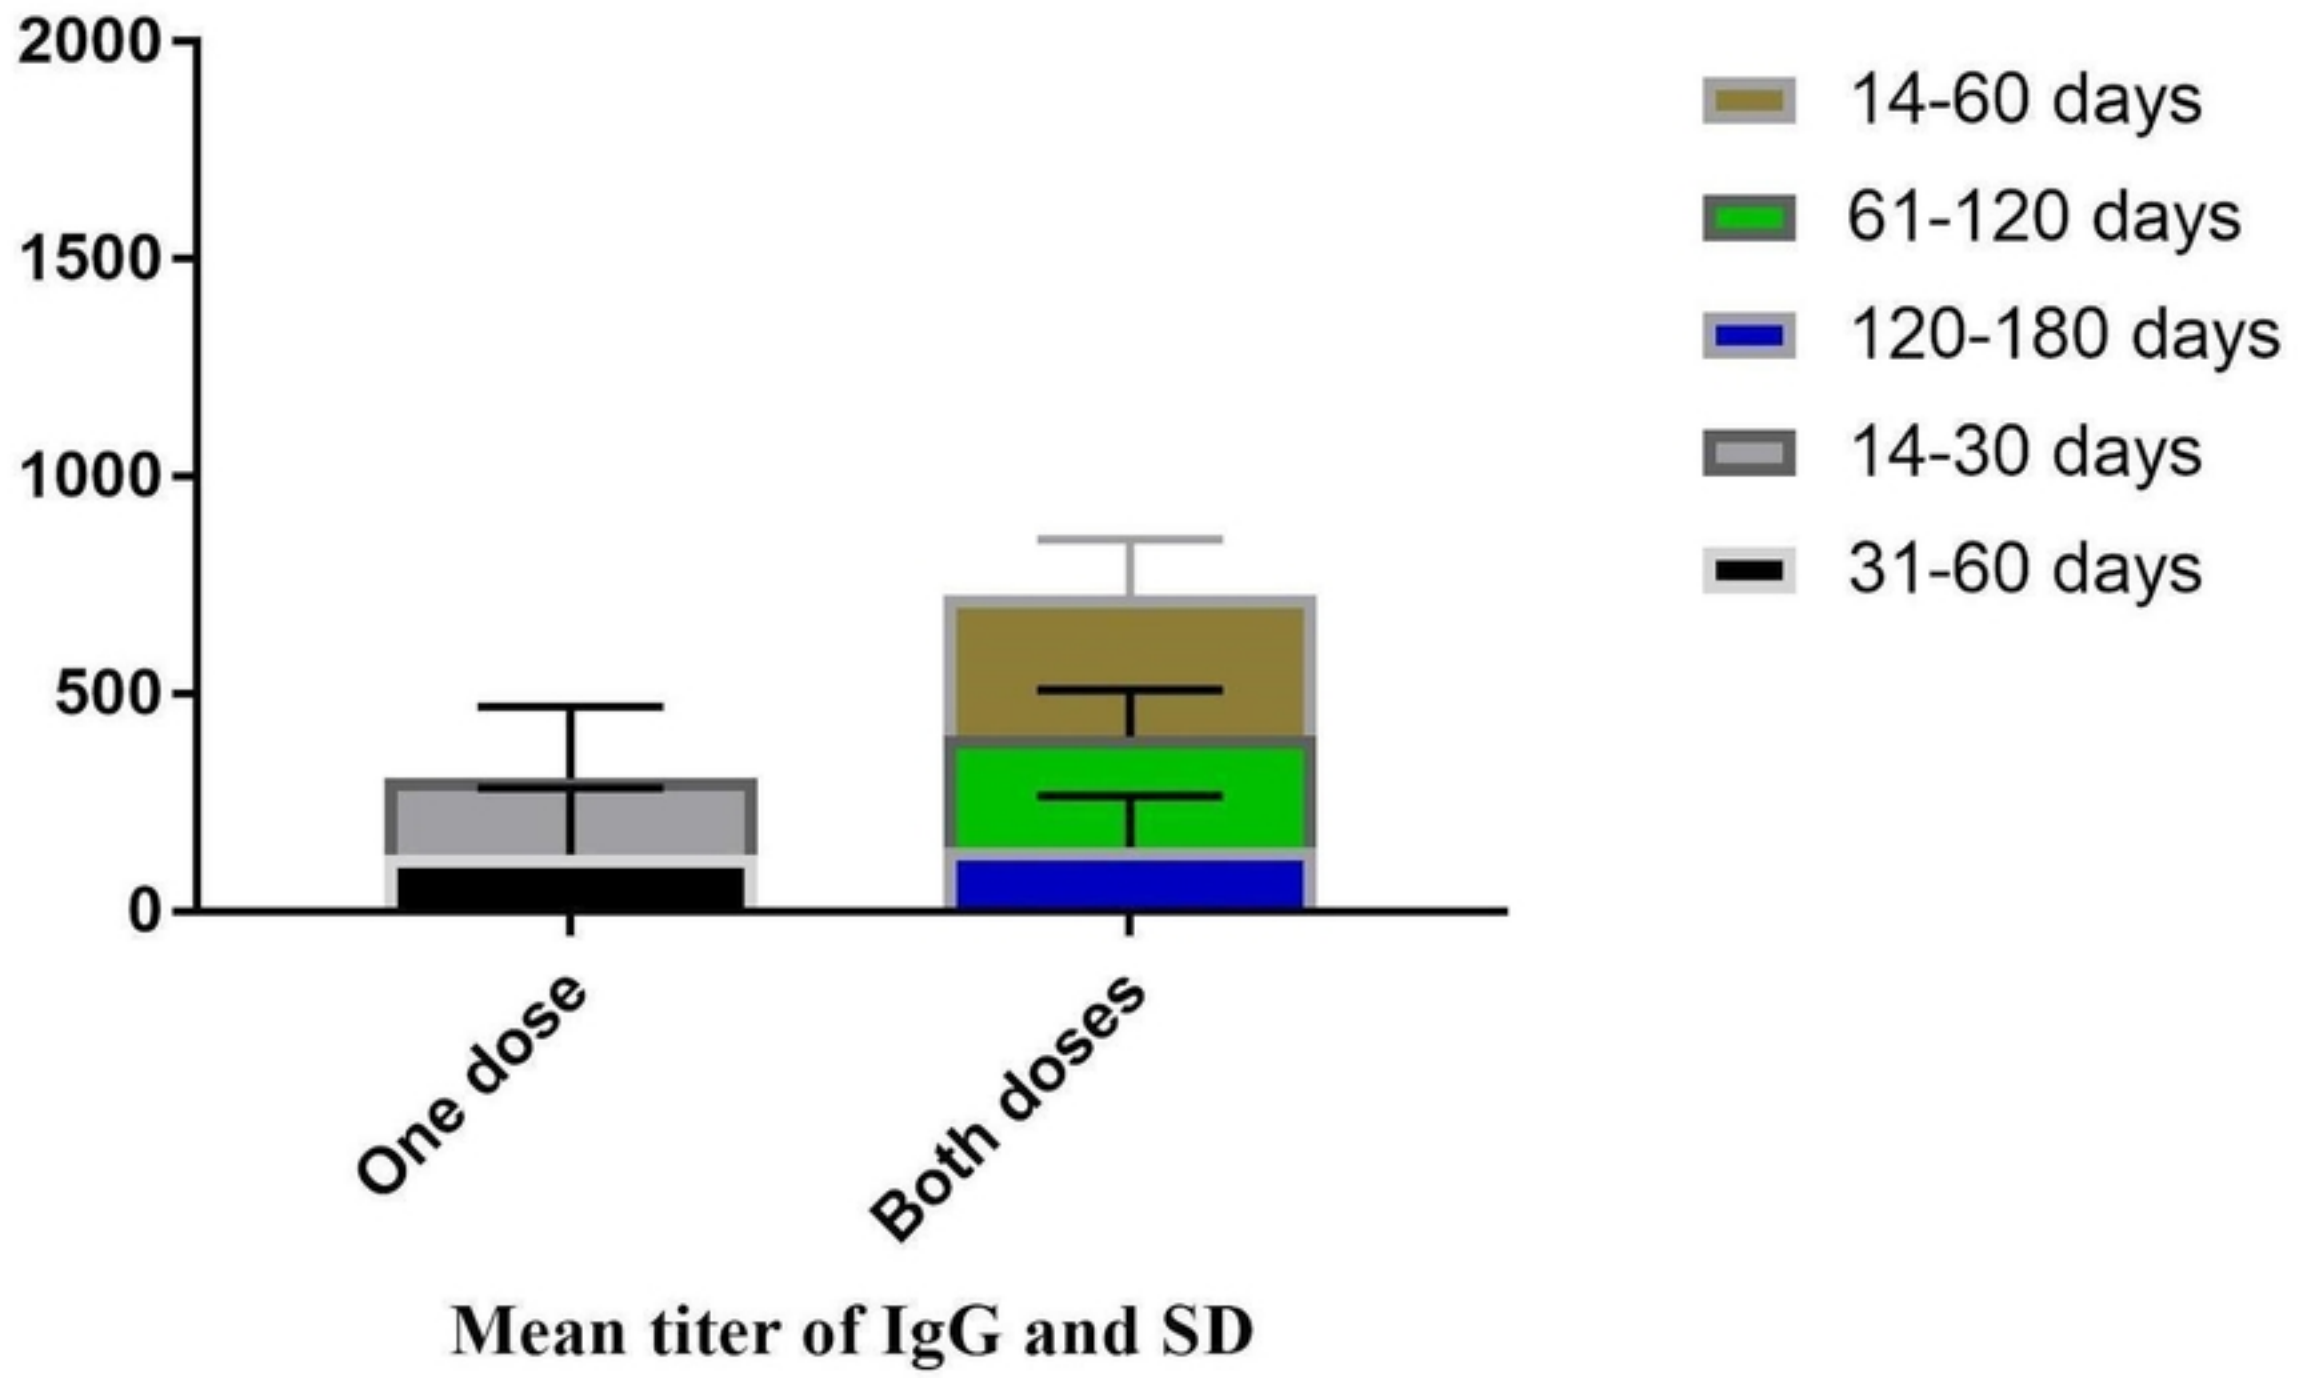

Figure 2
